# Supplementary figures and images for: Golgi self-correction generates bioequivalent glycans to preserve cellular homeostasis
Source: eLife journal article supplement (doi:10.7554/elife.14814), 2016-06-08

**Figure 3-figure supplement 1.**

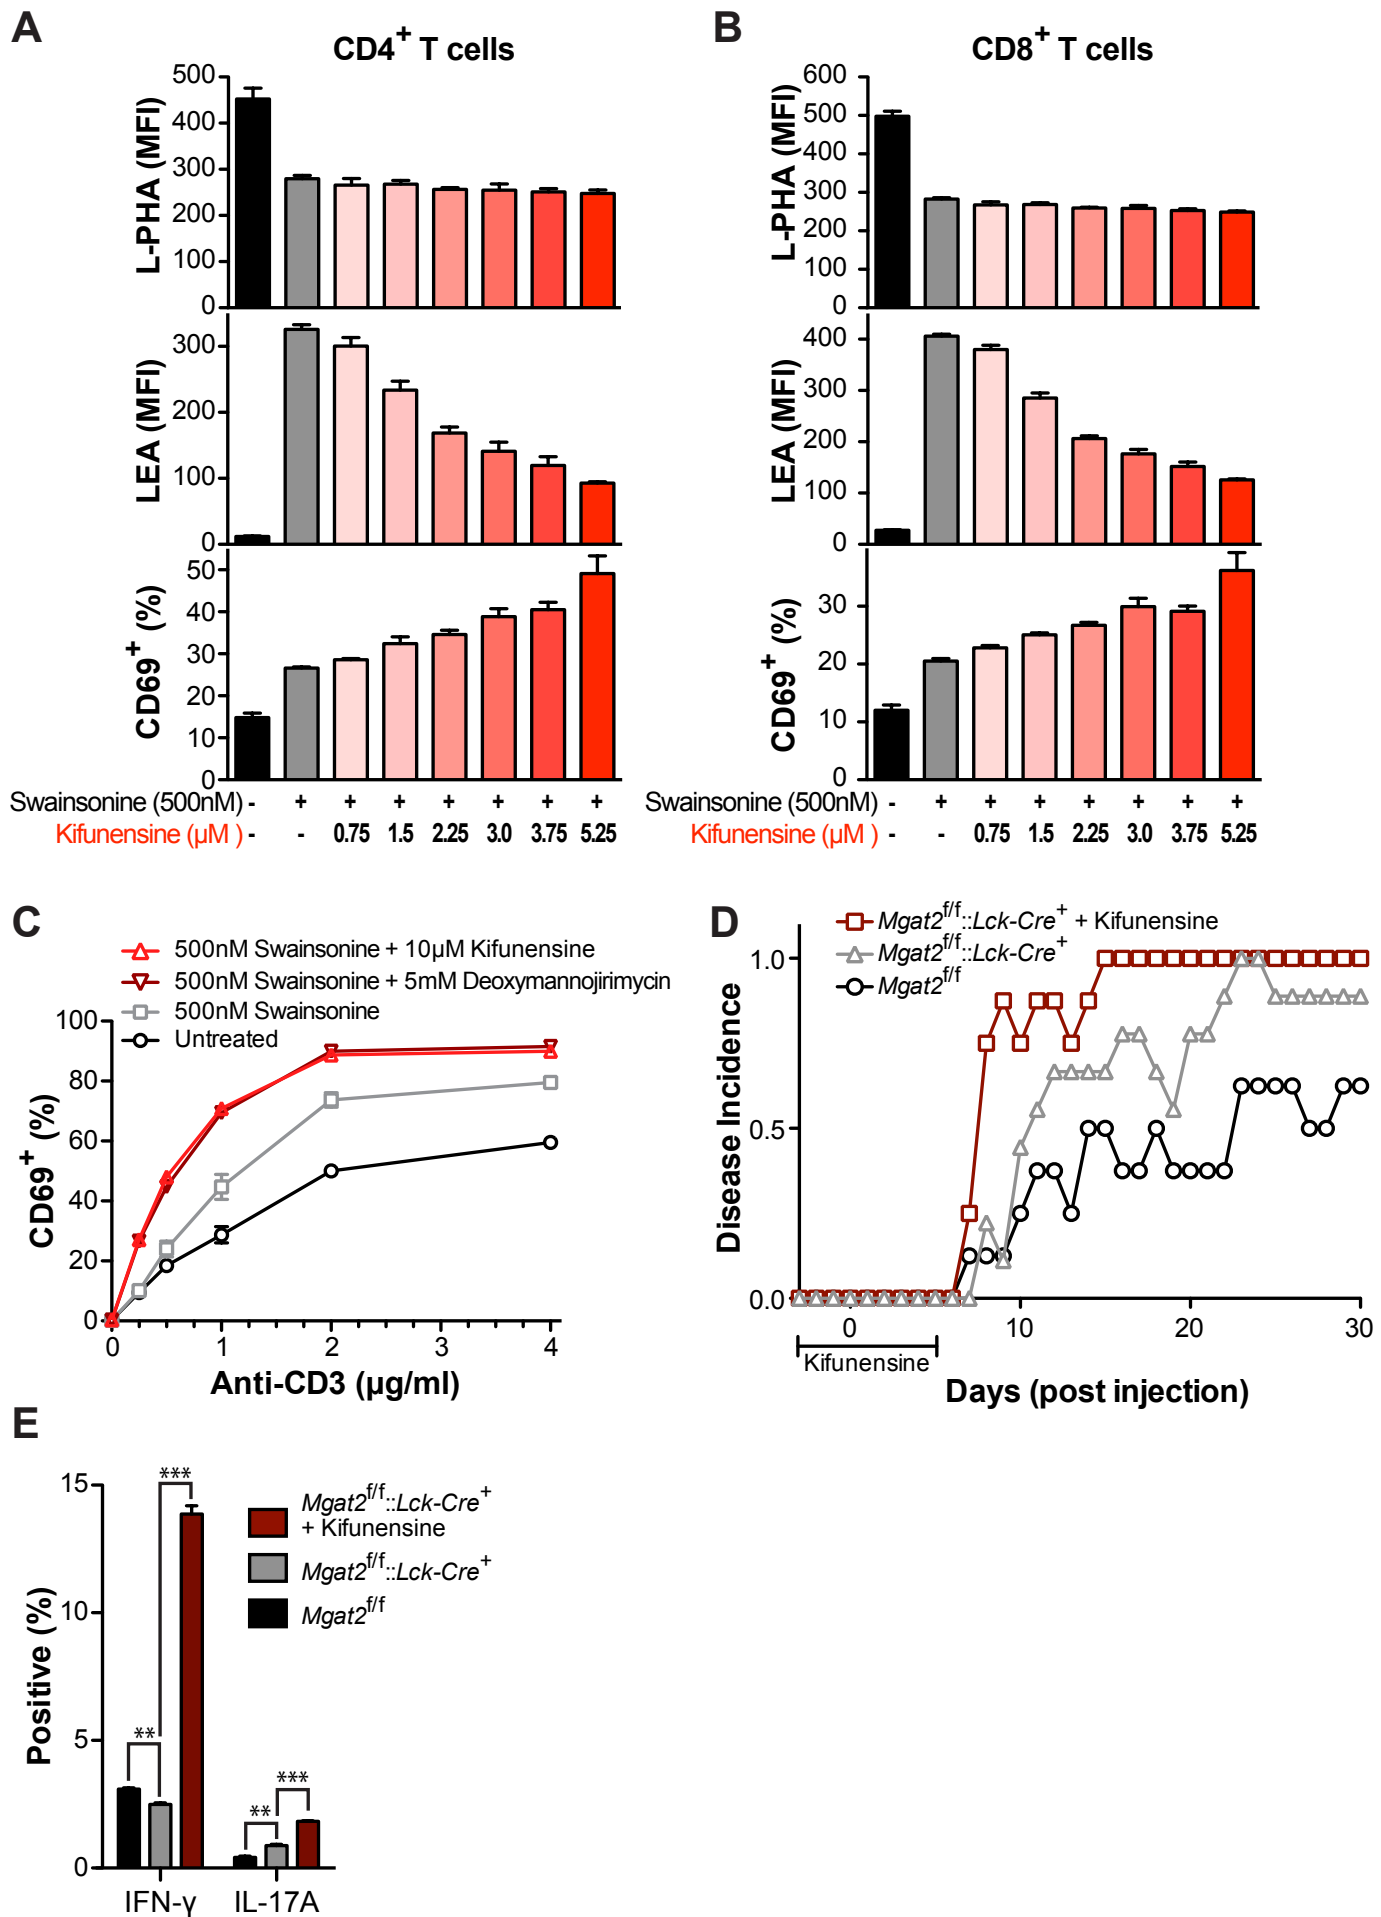

Supplement: supp [file elife-14814-supp-v1.zip]

Figure 5-figure supplement 1.

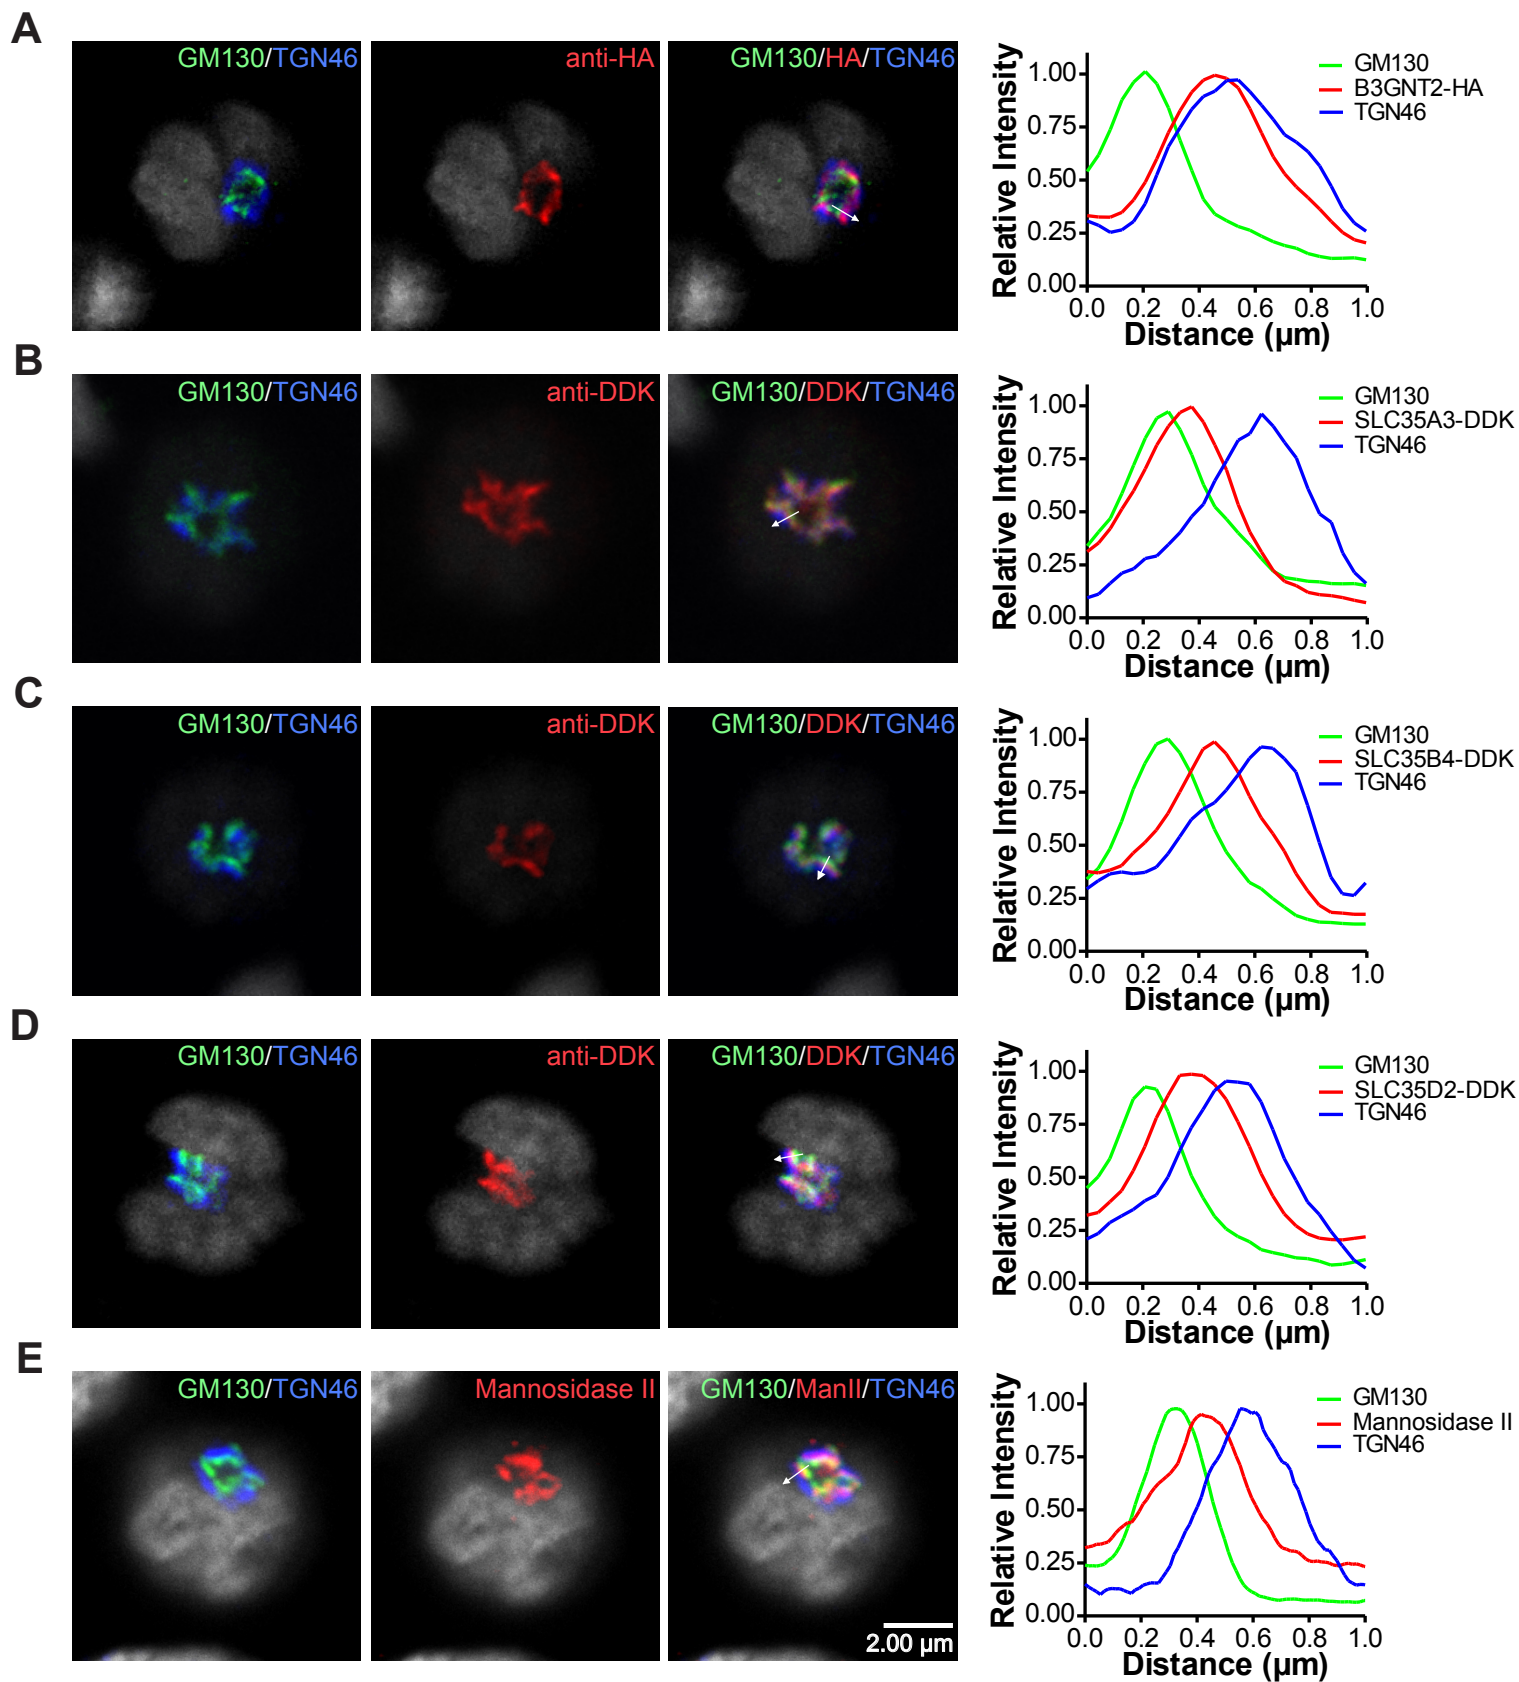

Supplement: supp [file elife-14814-supp-v1.zip]

Figure 4-figure supplement 1.

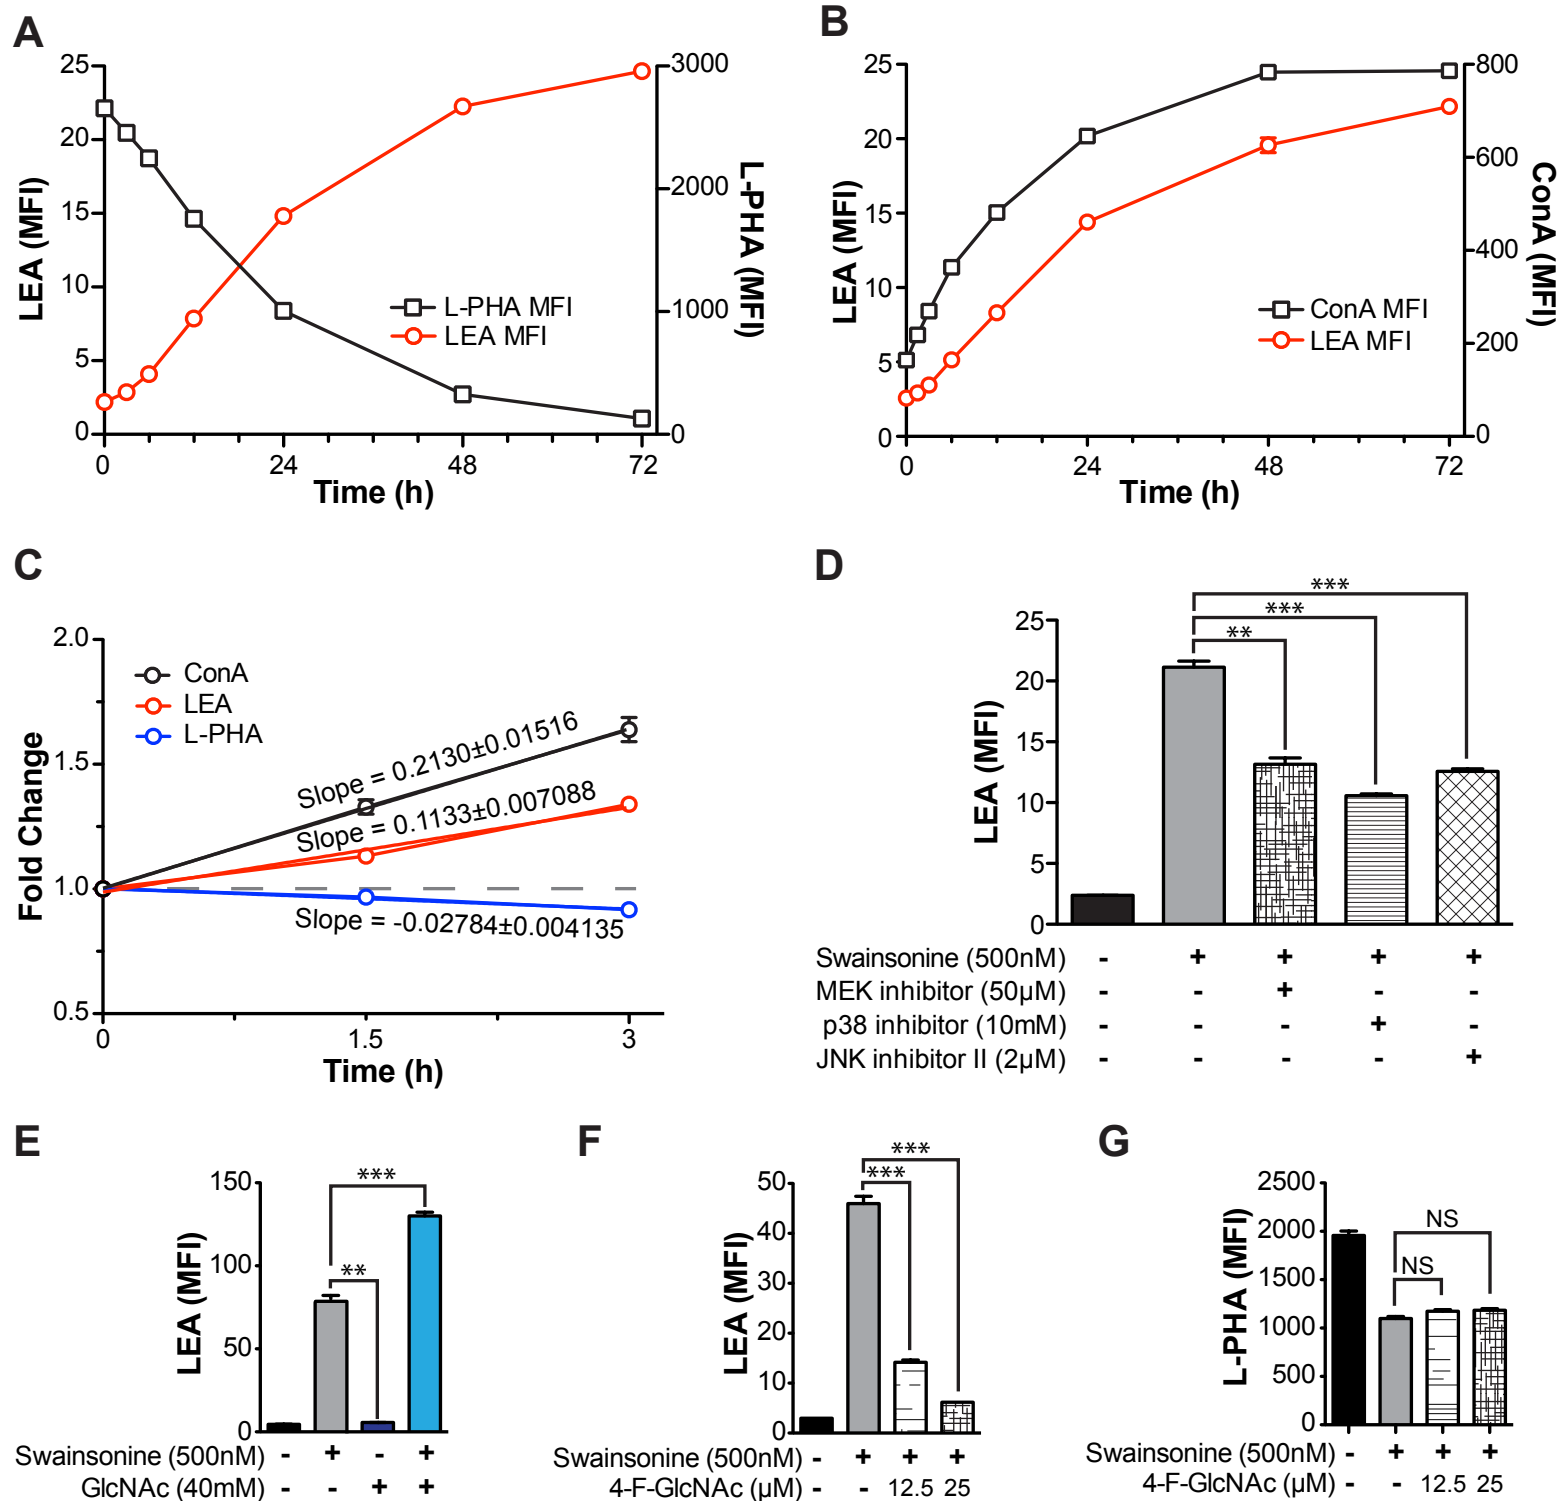

Supplement: supp [file elife-14814-supp-v1.zip]

Figure 2-figure supplement 2.

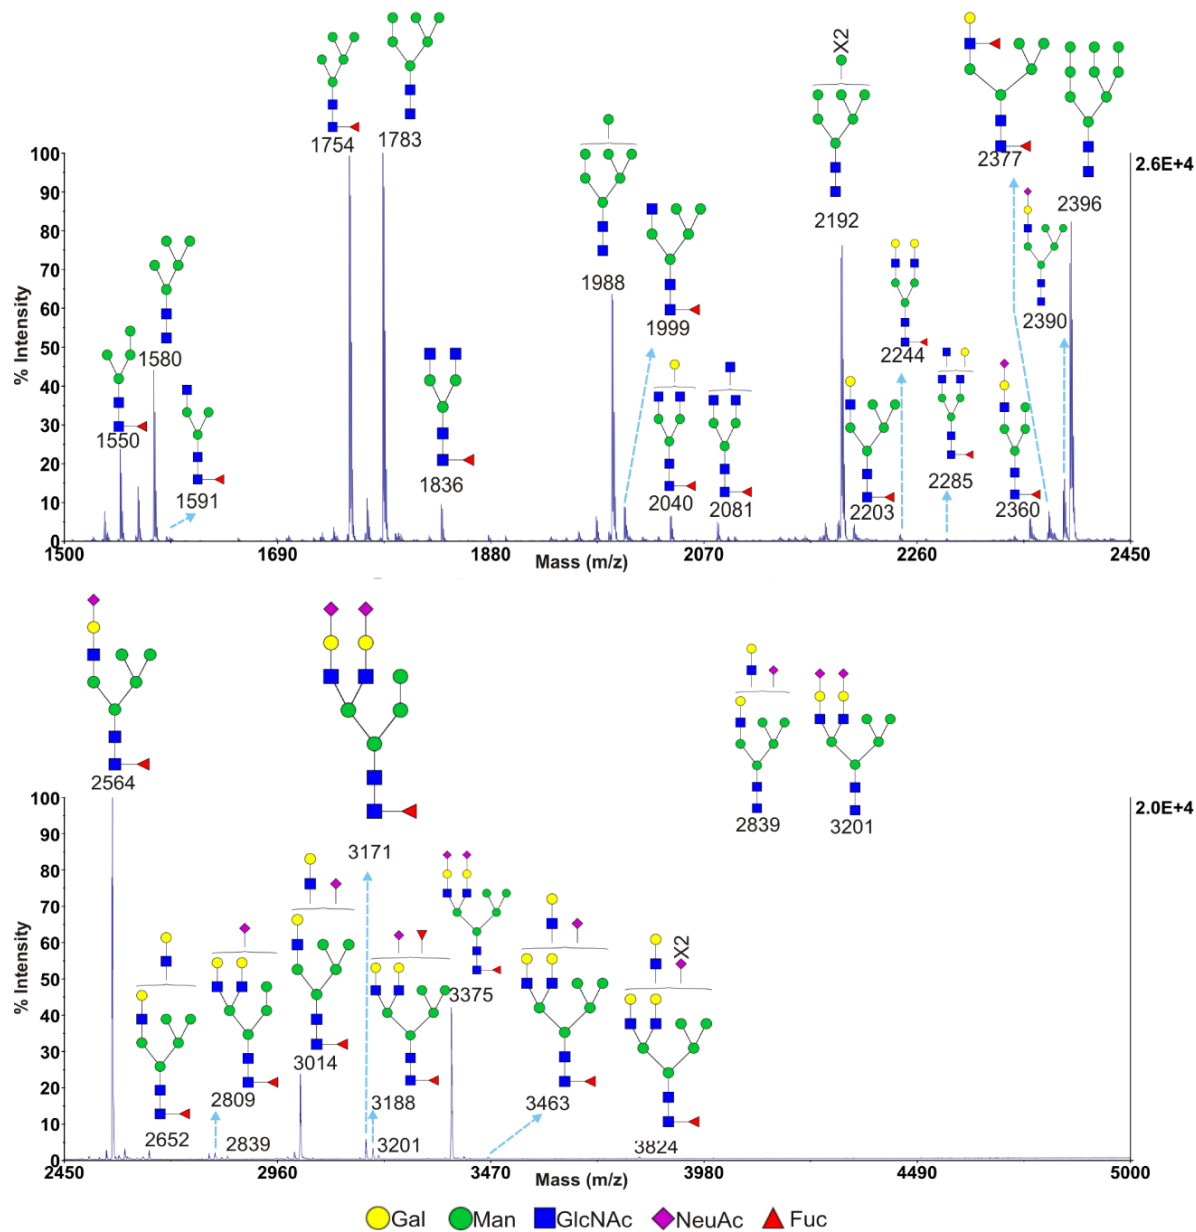

Supplement: supp [file elife-14814-supp-v1.zip]

# Figure 1-figure supplement 1.

A

## N-Glycan Pathway

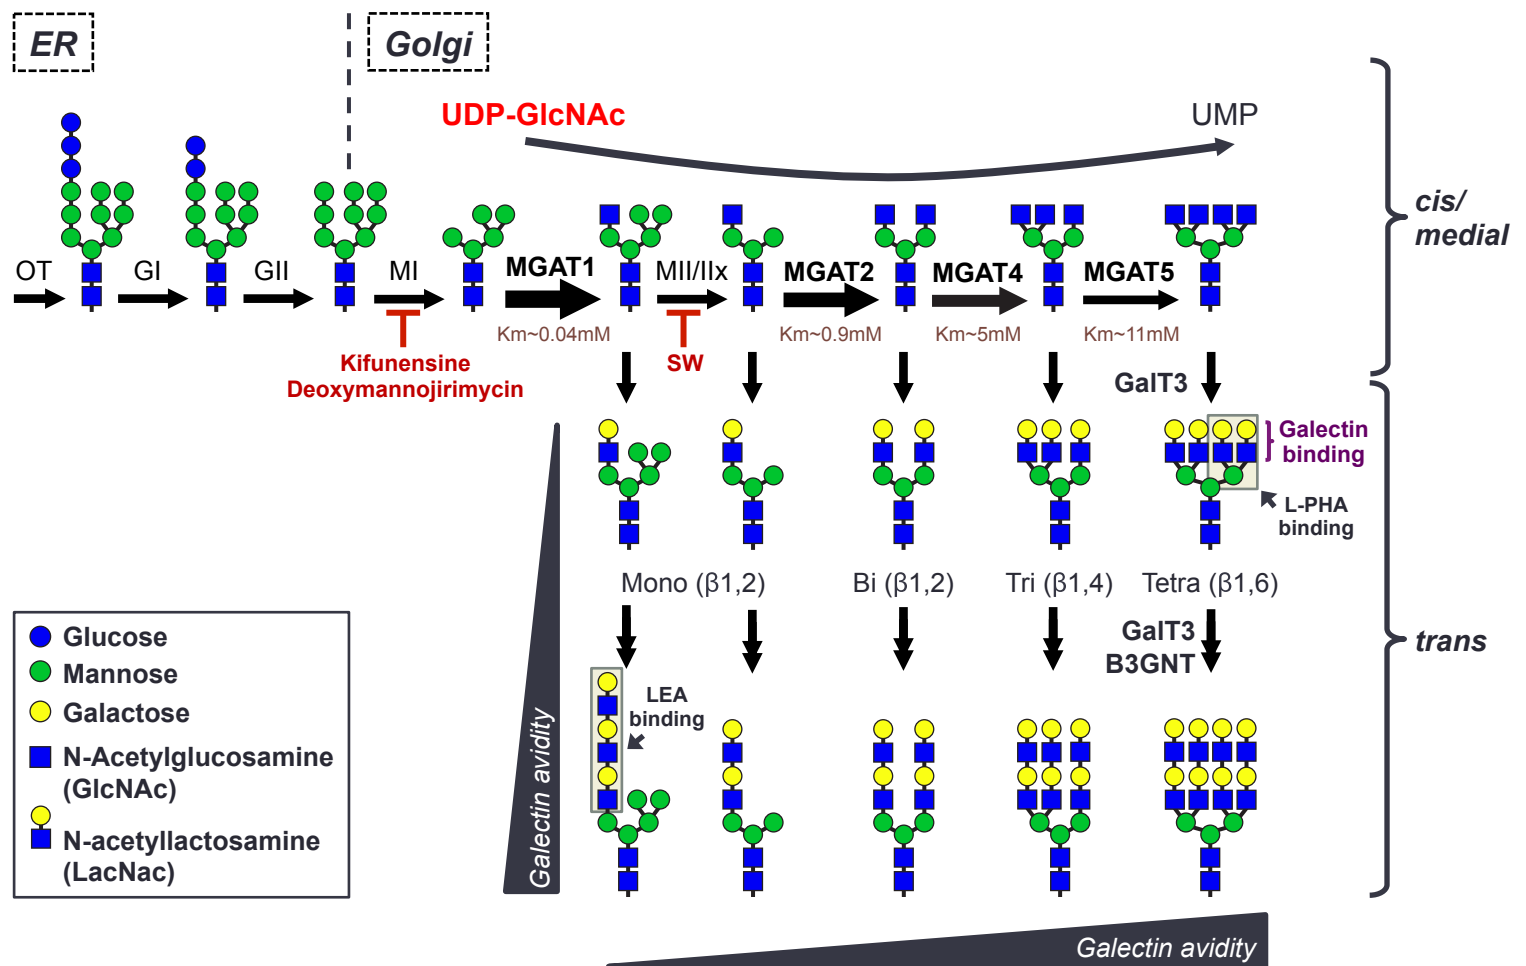

B

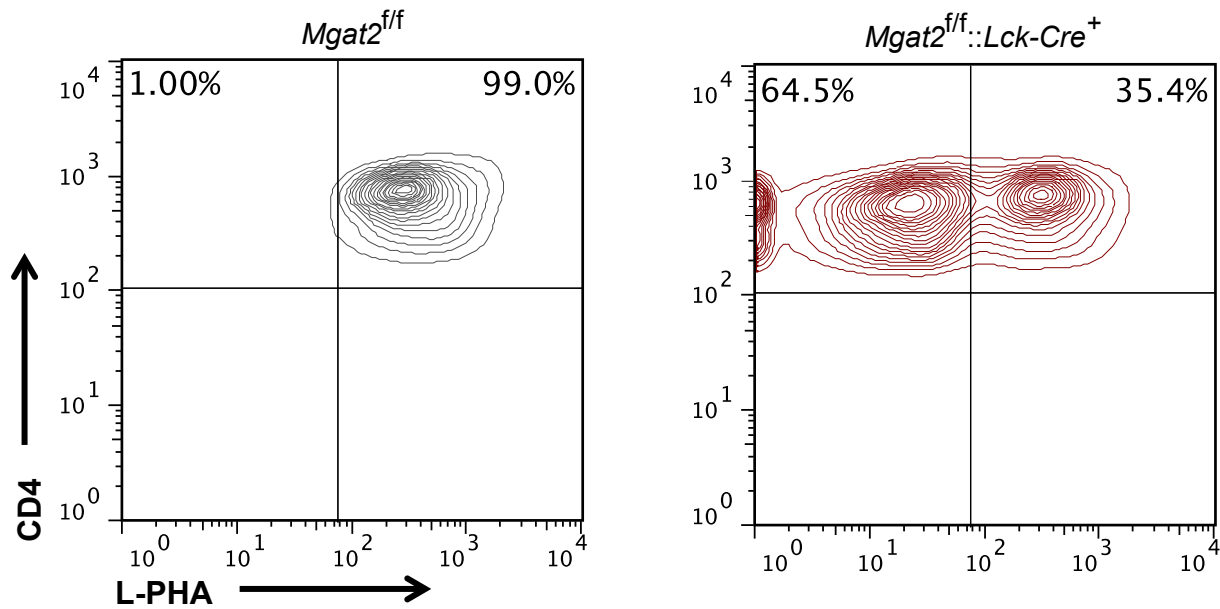

Supplement: supp [file elife-14814-supp-v1.zip]

Figure 2-figure supplement 3.

A

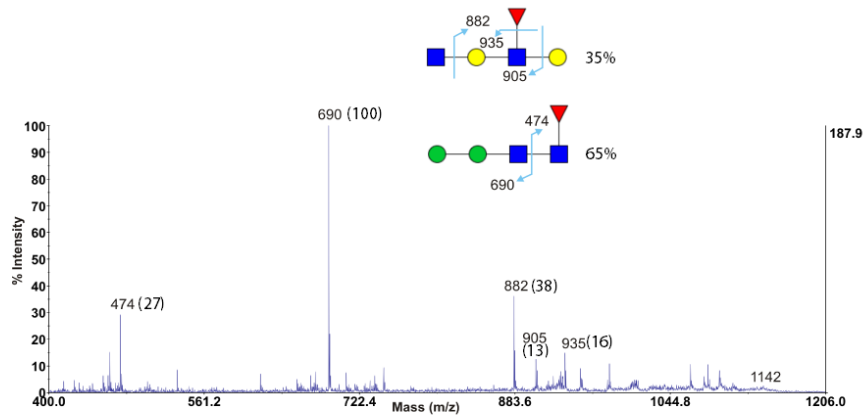

B

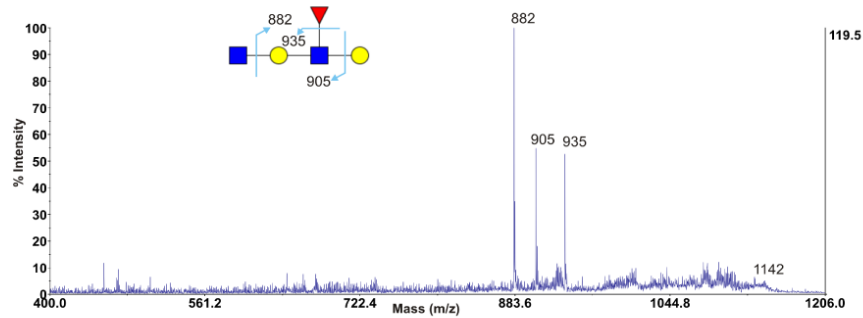

C

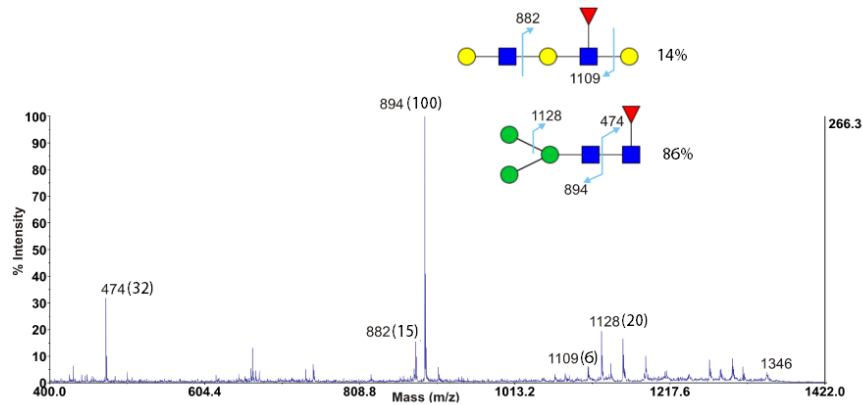

D

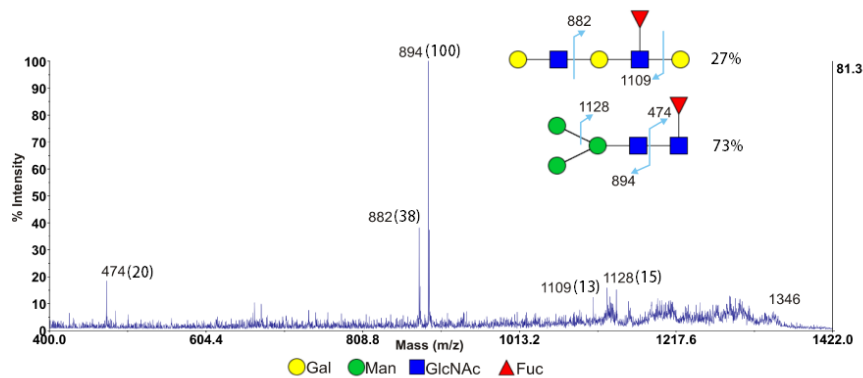

Supplement: supp [file elife-14814-supp-v1.zip]

**Figure 2-figure supplement 1.**

**A**

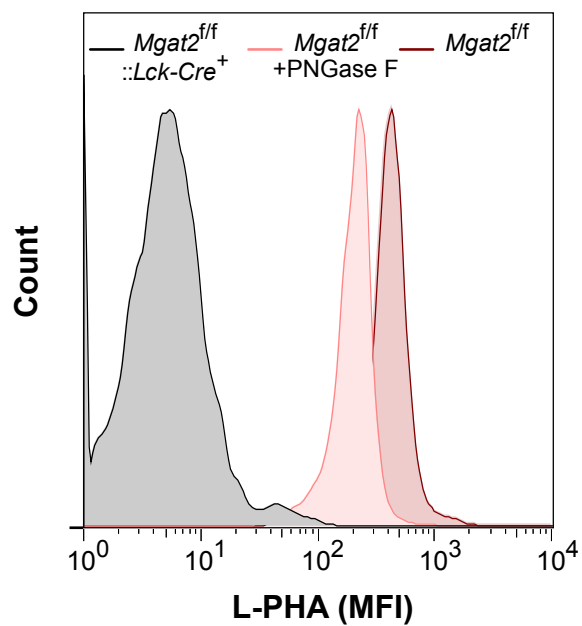

**B**

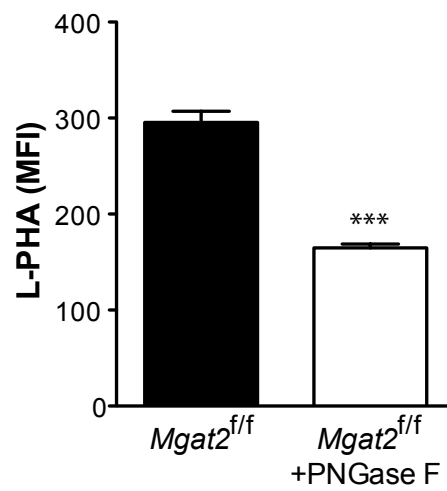

**C**

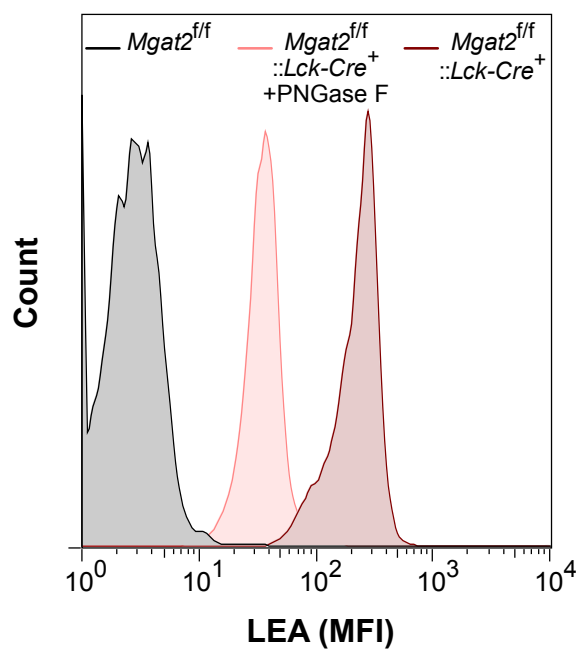

**D**

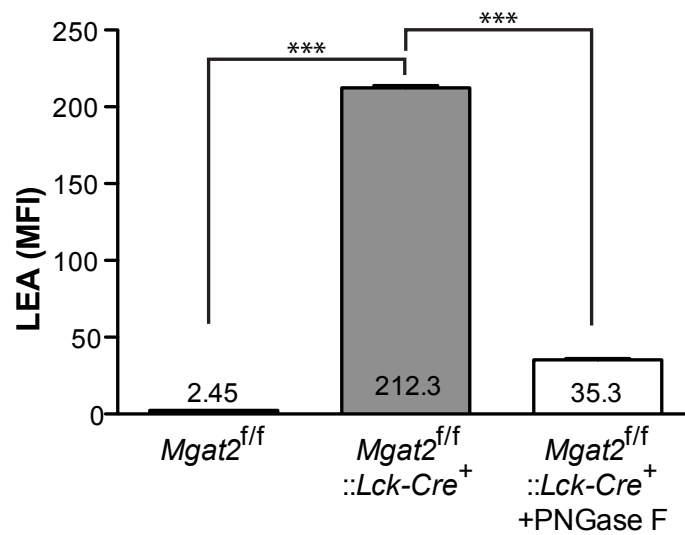

Supplement: supp [file elife-14814-supp-v1.zip]

**Figure 6-figure supplement 1.**

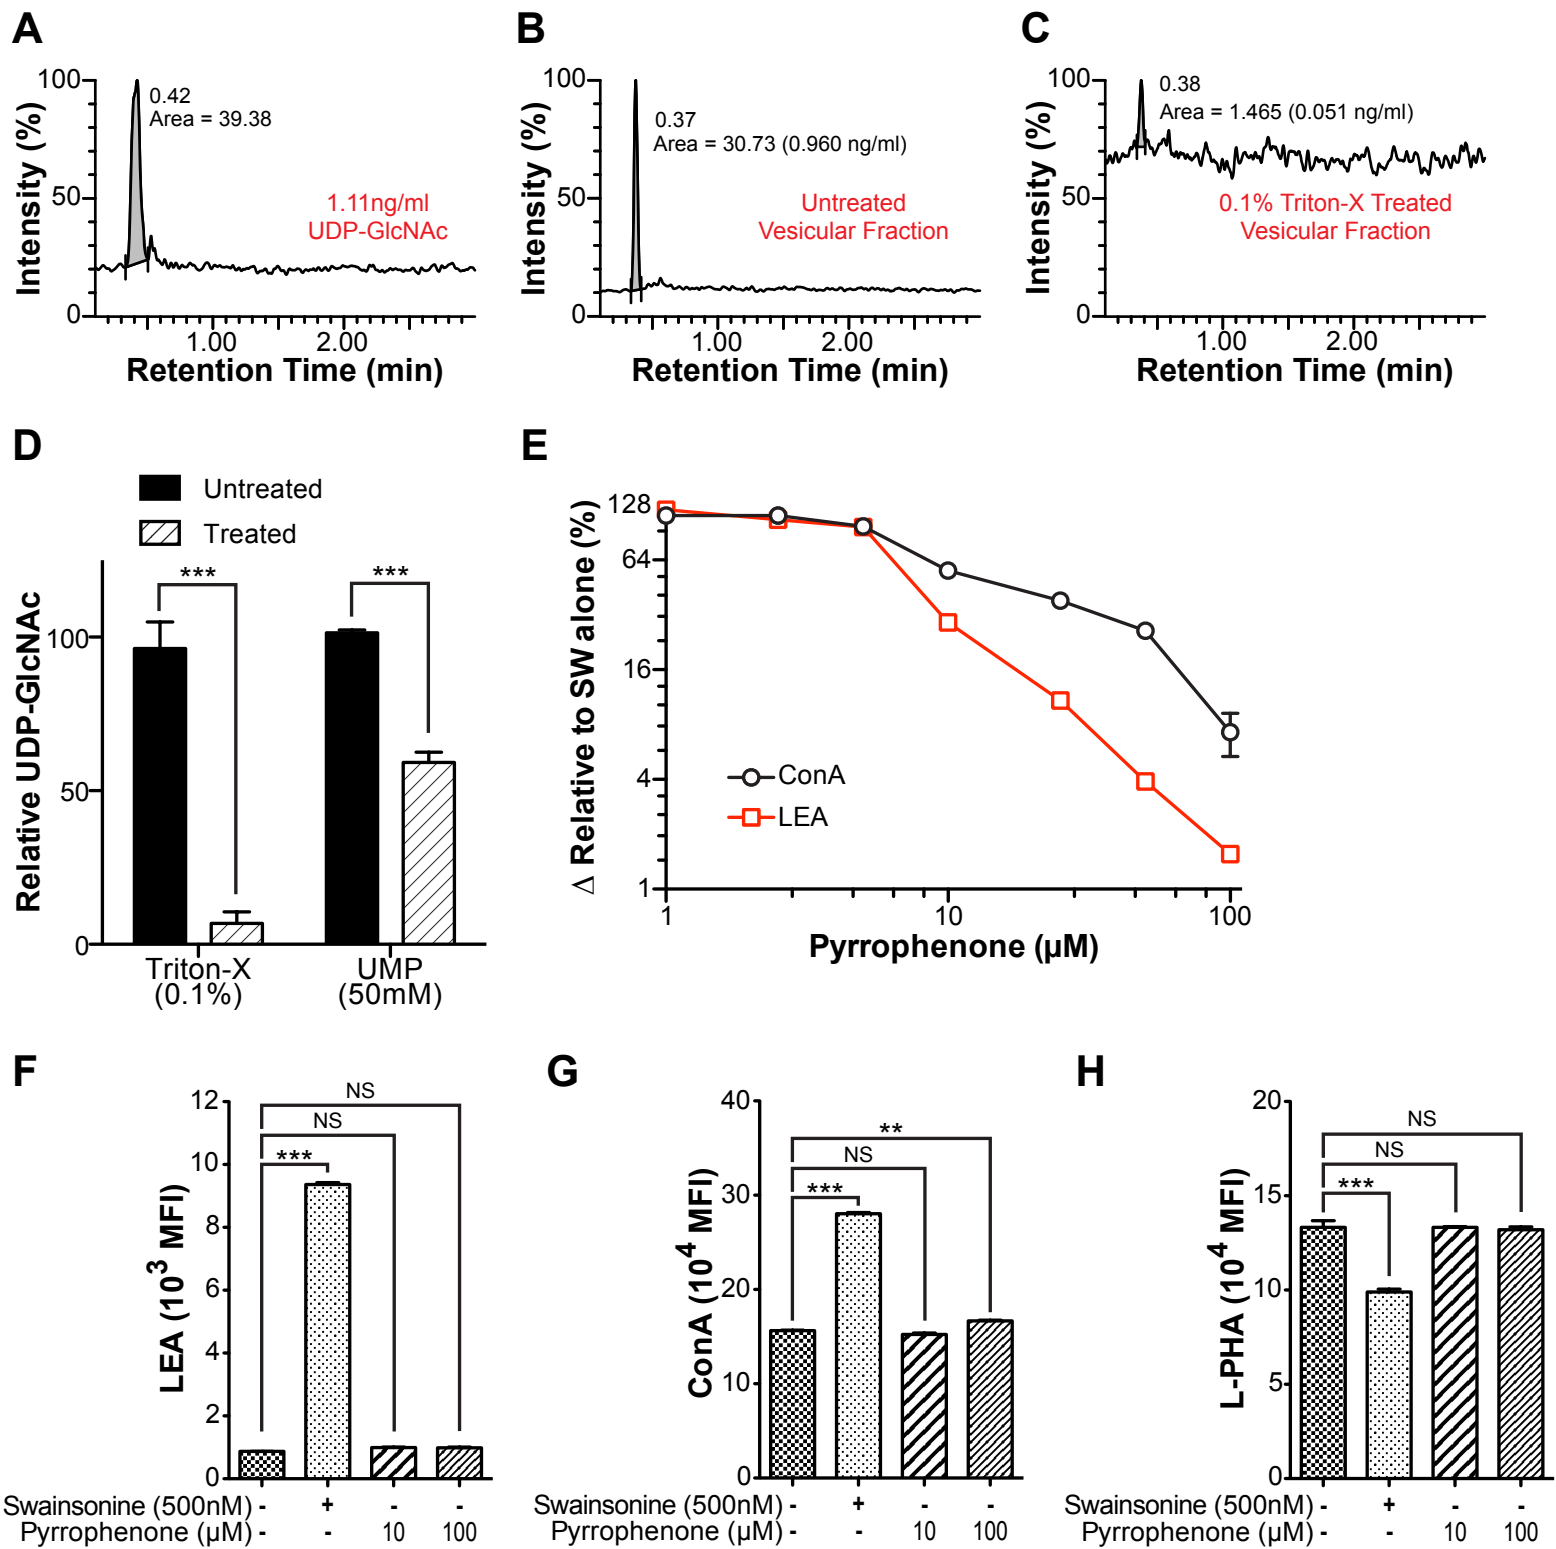

Supplement: supp [file elife-14814-supp-v1.zip]
